# Supplementary material
Source: PubMed Central journal article supplement (PMC5303051)
Supplement: SD9.pdf [file SD9.pdf]

## SUPPLEMENTAL APPENDIX

Categorization of risk level according to number of colony forming unit (CFU) of *Escherichia coli* in 1 and 100 mL water tests

| <i>E. coli</i> (CFU/1 mL) | <i>E. coli</i> (CFU/100 mL) | Risk level | Fecal contamination |
|---------------------------|-----------------------------|------------|---------------------|
| 0                         | 0                           | Low        | No                  |
| ≤ 1                       | 1 to 10                     | Moderate   | Yes                 |
| ≤ 1                       | 11 to < 100                 | High       | Yes                 |
| 2                         | 11 to ≤ 30                  | High       | Yes                 |
| 0                         | ≥ 100                       | High       | Yes                 |
| ≥ 2                       | > 30                        | Very high  | Yes                 |
| 1                         | > 100                       | Very high  | Yes                 |

Records were flagged for error and excluded from the analysis in following conditions: if the number of CFU in 1 mL water sample is higher than in 100 mL water sample when the actual count in 1 mL sample is between 2 and 99 CFU or if the CFU count in 1 mL sample is > 0 and in 100 mL sample is ≤ 10 or if the CFU count in 1 mL sample is ≥ 3 and in 100 mL sample is ≤ 30 (NMICS 2014).
